# Supplementary material
Source: MDPI journal article supplement (https://www.mdpi.com/2673-7140/2/1/9)
Supplement: s1 [file s1]

Archive with 1 entries (1 files):
- stresses-1558566-supplementary.pdf
